# Supplementary material
Source: MDPI journal article supplement (https://www.mdpi.com/2673-4125/2/1/8)
Supplement: s1 [file s1 › biophysica-1548513-supplementary.pdf]

Supplementary Material

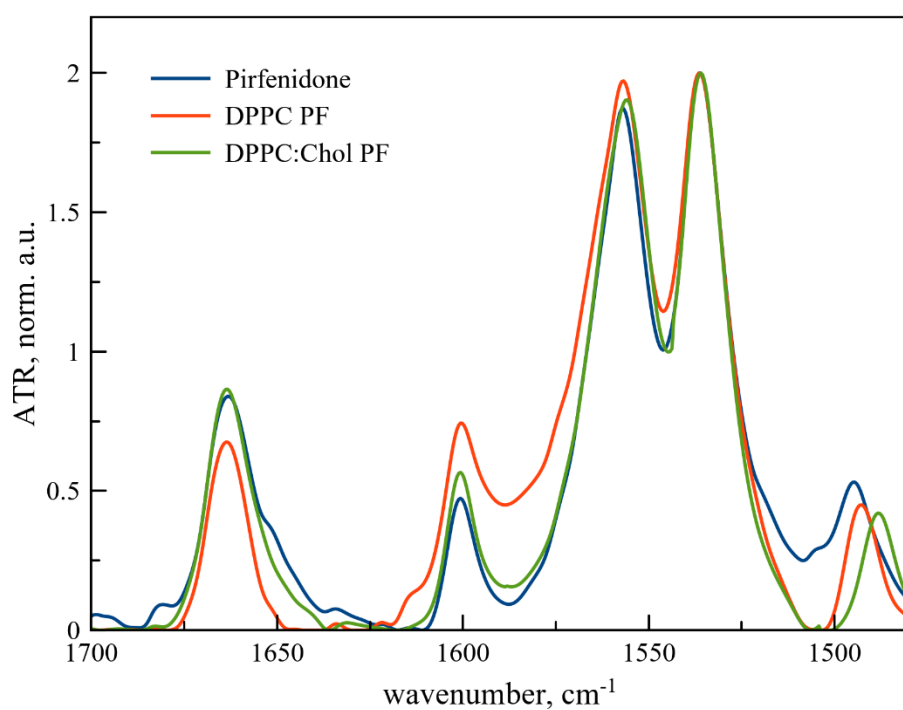

Figure S1. Normalized ATR-FTIR spectra of pirfenidone (blue) and liposomal forms of pirfenidone. Main bands of pirfenidone are presented. 0,02 M sodium-phosphate buffer solution, pH 7.4. 22°C.

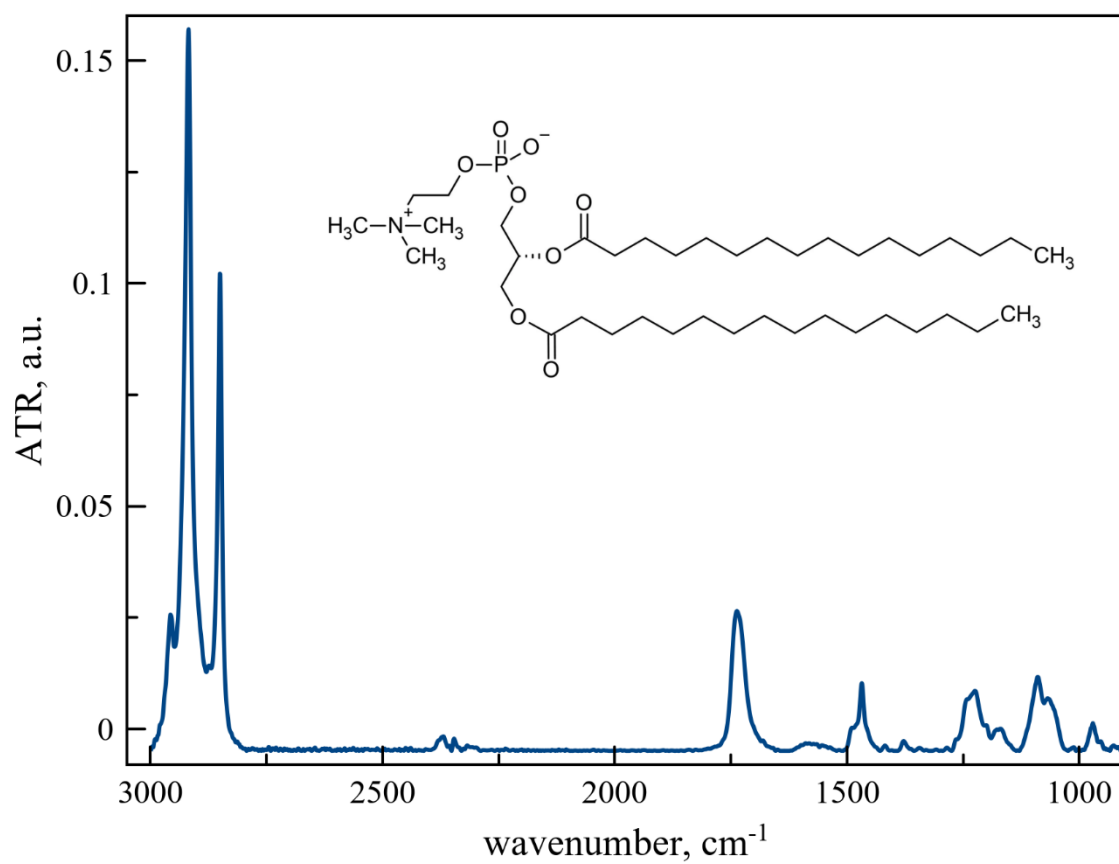

Figure S2. ATR-FTIR spectrum of DPPC liposomes. Total lipid concentration 5 mg/ml. 0,02 M sodium-phosphate buffer solution, pH 7.4. 22°C.

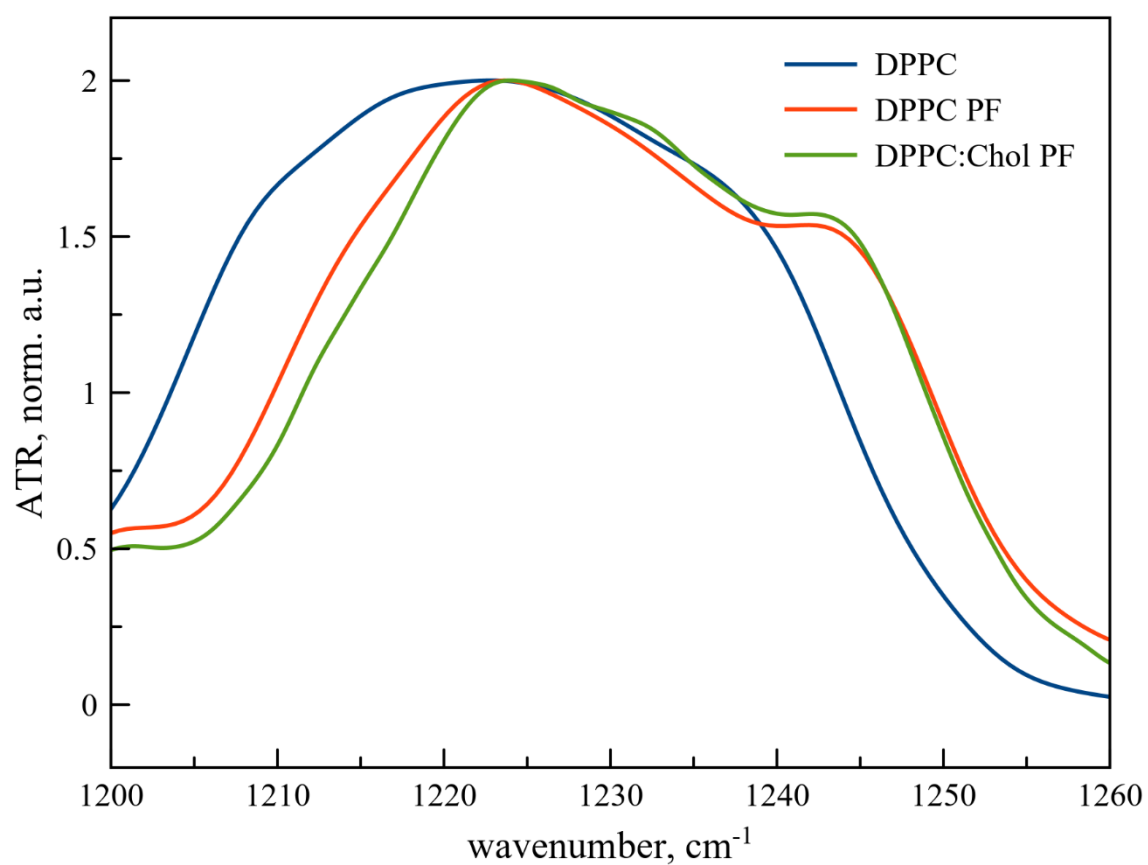

Figure S3. Normalized ATR-FTIR spectrum of DPPC liposomes and liposomal forms of pirfenidone in the area of asymmetric valence oscillation of phosphate groups. Total lipid concentration 5 mg/ml. 0,02 M sodium-phosphate buffer solution, pH 7.4. 22°C.
